# Supplementary material for: Using Posterior EEG Theta Band to Assess the Effects of Architectural Designs on Landmark Recognition in an Urban Setting
Source: PubMed Central journal article supplement (PMC7759667; doi:10.3389/fnhum.2020.584385), 2020-12-11
Supplement: Table_1.pdf [file Table_1.pdf]

| Building Description                                          | Mean Gaze Time (s) | Gaze Time Std. Dev. (s) | Mean Gaze Count | Gaze Count Standard Deviation | Order in route 1 | Order in route 2 | Mean Location Recall Accuracy |
|---------------------------------------------------------------|--------------------|-------------------------|-----------------|-------------------------------|------------------|------------------|-------------------------------|
| B10<br>Footprint: Rectangle<br>Façade: Twist                  | 11.91              | 6.94                    | 3.75            | 2.10                          | 3                | 9                | 17.86%                        |
| B08<br>Footprint: Rectangle<br>Façade: Nature                 | 9.76               | 6.84                    | 2.75            | 1.92                          | 2                | 12               | 86.21%                        |
| B11<br>Footprint: Rectangle<br>Façade: Voronoi                | 8.17               | 4.66                    | 2.57            | 1.26                          | 8                | 1                | 62.07%                        |
| B12<br>Footprint: Pentagon<br>Façade: Twist                   | 7.91               | 6.64                    | 2.46            | 1.71                          | 7                | 2                | 75.00%                        |
| B07<br>Footprint: Rectangle<br>Façade: Vertical               | 7.87               | 5.71                    | 2.21            | 1.10                          | 5                | 8                | 65.52%                        |
| B01<br>Footprint: Rectangle<br>Façade: Horizontal             | 7.01               | 5.23                    | 2.50            | 1.80                          | 6                | 4                | 46.43%                        |
| B09<br>Height: Tall<br>Footprint: Rectangle<br>Façade: Grid   | 6.80               | 5.37                    | 2.89            | 1.97                          | —                | —                | —                             |
| B02<br>Footprint: Rectangle<br>Façade: Horizontal w/ overhang | 5.28               | 6.93                    | 2.00            | 2.23                          | —                | —                | —                             |
| B06<br>Footprint: Circle<br>Façade: Grid                      | 5.23               | 4.82                    | 1.93            | 1.68                          | 1                | 6                | 35.71%                        |
| B05<br>Footprint: Rectangle<br>Façade: Grid                   | 4.90               | 4.43                    | 2.29            | 1.51                          | 10               | 3                | 31.03%                        |
| B03<br>Footprint: Rectangle<br>Façade: Grid                   | 3.85               | 4.45                    | 1.54            | 1.32                          | 12               | 11               | 27.59%                        |
| B04<br>Footprint: Rectangle<br>Façade: Grid                   | 3.39               | 2.83                    | 1.43            | 1.14                          | 11               | 10               | 14.29%                        |
